# Supplementary material
Source: Research Square preprint supplement (doi:10.21203/rs.3.rs-9293900/v1)
Supplement: Supplementary file 1 [file f2e0ad8b034d3e2c436c96d6.docx]

**Appendix**

Table 3: GRIPP2-Short Form Table

| GRIPP2-SF criterion | Description |
| --- | --- |
| Aim: Report the aim of the study | Through a PPIE activity drawing from lived experiences of participants in research studies that used digital devices, understand (i) how missing data might arise in trials with digital outcome measures and (ii) whether there could be informative missingness. |
| Methods: Provide a clear description of the methods used for PPIE in the study | Pre-funding PPIE activities and a foundation meeting with the CIG-DO helped shape the recruitment and structure of meetings. The CIG-DO members attended three meetings and contributed to pre- and post-meeting surveys. Three members of the CIG-DO edited the Plain English Summary and three members of the CIG-DO co-authored the manuscript. |
| Results: Report the results of PPIE in the study, including both positive and negative outcomes | PPIE contributors provided insights on why data may be missing, which included operational aspects of the device, unresolved technology issues, weather or season affecting comfort and the need to remove devices for religious activities. They noted the importance of considering informative missingness, although this was not part of their lived experience. |
| Discussion: Comment on the extent to which PPIE influenced the study overall. Describe positive and negative effects | PPIE contributors significantly influenced the activity by sharing their expectations about the level of statistical content and need for materials/resources to be shared. They provided ongoing feedback on the conduct of meetings.   Finding meeting times when all members of CIG-DO and researchers/facilitators could meet was difficult, so several small-group and one-on-one meetings were necessary. |
| Reflections: Comment critically on the study, reflecting on the things that went well and those that did not, so others can learn from this experience | Learnings from previous PPIE activities and input shaped the activity positively such that contributors could learn about statistical concepts around missing data.   Recruiting individuals who could speak about informative missingness was difficult, as those in the CIG-DO generally used devices per protocol even when they faced challenges. PPIE contributors provided suggestions on overcoming this limitation via purposeful recruitment and reducing stigma when discussing deviation from study protocol. |
